# Supplementary material for: Revised fractional abundances and warm-season temperatures substantially improve brGDGT calibrations in lake sediments
Source: Copernicus journal article supplement (doi:10.5194/bg-18-3579-2021), 2021-06-17
Supplement: Supplementary file 1 [file bg-18-3579-2021-supplement.zip]

Archive with 4 entries (4 files):
- bg-18-3579-2021-supplement-title-page.pdf
- supplement_pt1.pdf
- supplement_pt2.html
- supplemental_data.xlsx
