# Supplementary material for: Revised fractional abundances and warm-season temperatures substantially improve brGDGT calibrations in lake sediments
Source: Copernicus journal article supplement (doi:10.5194/bg-18-3579-2021), 2021-06-17
Supplement: Supplementary file 1 [file bg-18-3579-2021-supplement.zip › bg-18-3579-2021-supplement-title-page.pdf]

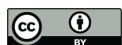

*Supplement of*

**Revised fractional abundances and warm-season temperatures substantially improve brGDGT calibrations in lake sediments**

**Jonathan H. Raberg et al.**

*Correspondence to:* Jonathan H. Raberg ([jonathan.raberg@colorado.edu](mailto:jonathan.raberg@colorado.edu))

- [bg-18-3579-2021-supplement-title-page.pdf](#)
- [supplement\\_pt1.pdf](#)
- [supplement\\_pt2.html](#)
- [supplemental\\_data.xlsx](#)

The copyright of individual parts of the supplement might differ from the article licence.
